# Supplementary material for: Carbon-coated silicon/graphite oxide composites as anode materials for highly stable lithium-ion batteries
Source: Royal Society of Chemistry journal article supplement (doi:10.1039/d4cp01424c), 2024-01-01
Supplement: d4cp01424c2.pdf [file d4cp01424c2.pdf]

## Carbon-coated silicon/graphite oxide composites as anode for highly stable lithium-ion batteries

Lujie Niu,<sup>a</sup> Rui Zhang,<sup>b\*</sup> Qiang Zhang,<sup>a</sup> Dong Wang<sup>b, d</sup>, Yanlei Bi,<sup>a</sup> Guangwu Wen,<sup>b</sup> Lu-Chang Qin.<sup>c\*</sup>

a) School of Chemistry and Chemical Engineering, Shandong University of Technology, Zibo 255000, China

b) School of Materials Science and Engineering, Shandong University of Technology, Zibo 255000, China

c) Department of Physics and Astronomy, University of North Carolina at Chapel Hill, NC 27599-3255, USA

d) Shangdong Si-Nano Materials Technology Co. Ltd., Zibo 255000, P. R. China.

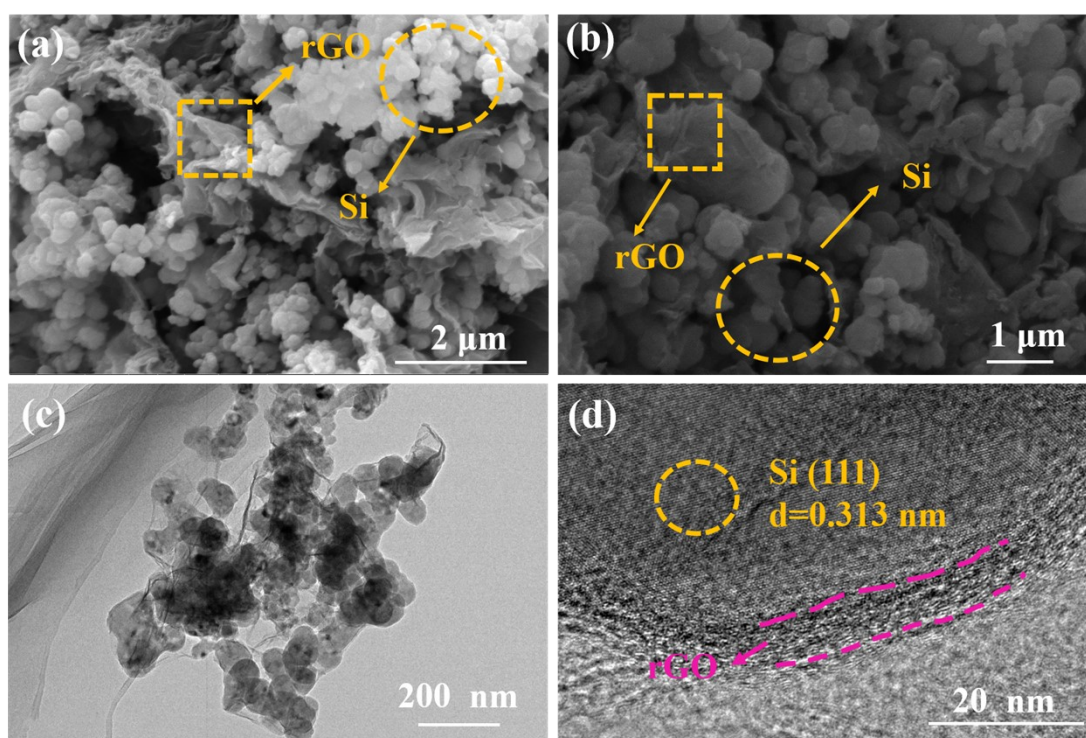

**Fig.S1.** (a - b) SEM images of Si/rGO. (c) TEM images of Si/rGO at low. (d) high-resolution of Si/rGO.

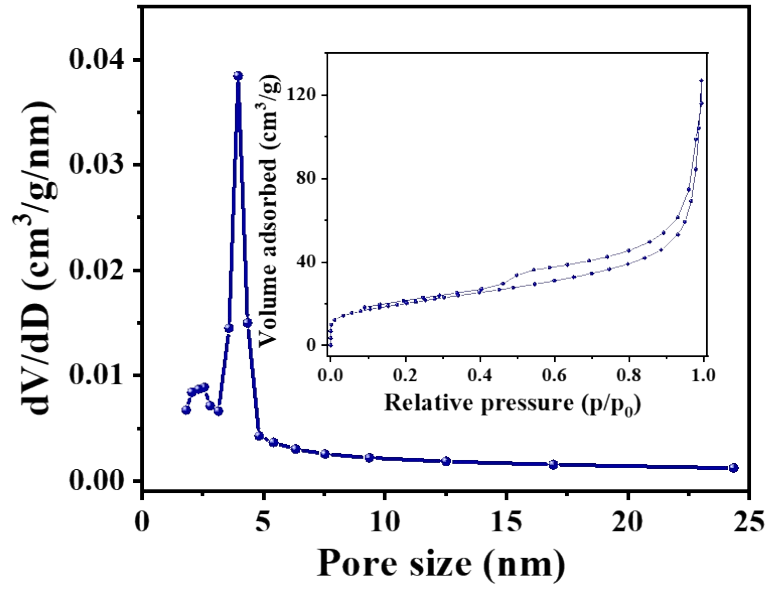

Fig.S2. Pore size distribution of the Si/rGO; Inset is the corresponding nitrogen adsorption/desorption. isotherms.

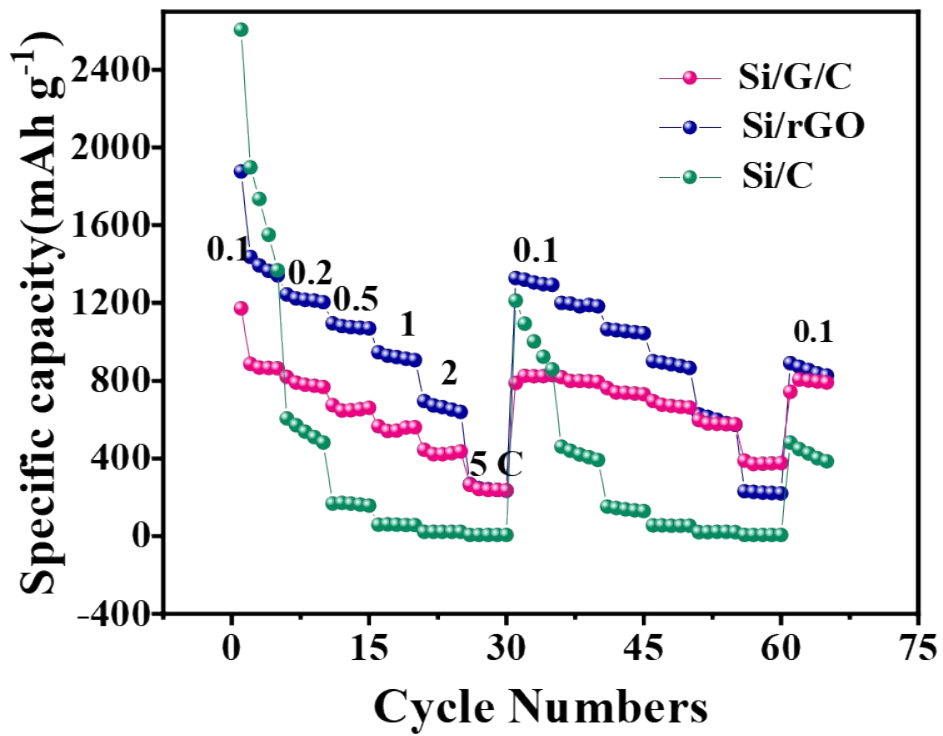

**Fig.S3.** (e) Rate capability of Si/G/C (Red), Si/rGO (blue) and Si/C (green).

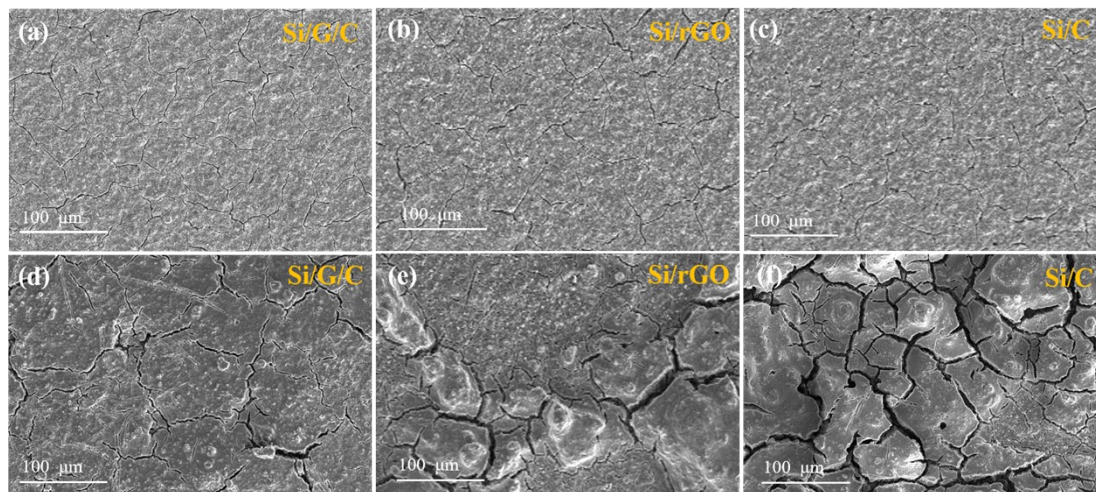

**Fig.S4.** (a) Si/G/C electrode surface before cycling. (b) Si/rGO electrode surface before cycling. (c) Si/C electrode surface before cycling. (d) Si/G/C electrode surface after 100 cycles. (e) Si/rGO electrode surface 100 cycles. (f) Si/C electrode surface 100 cycles.

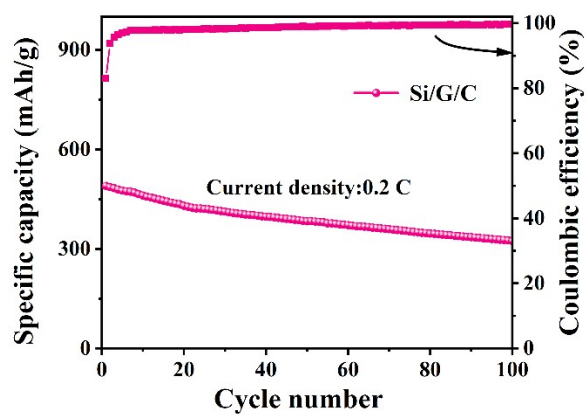

**Fig.S5.** Charge-Discharge profile in the full cell configuration using  $\text{LiFePO}_4$  as the cathode.

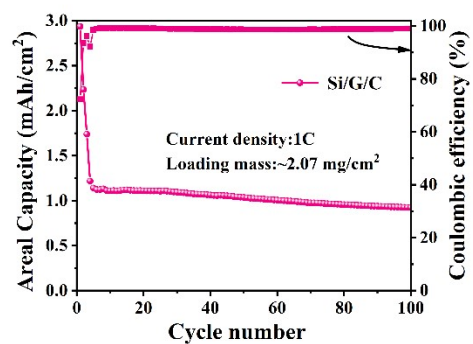

**Fig.S6.** Cycling stability testing of Si/G/C with higher active material loading.

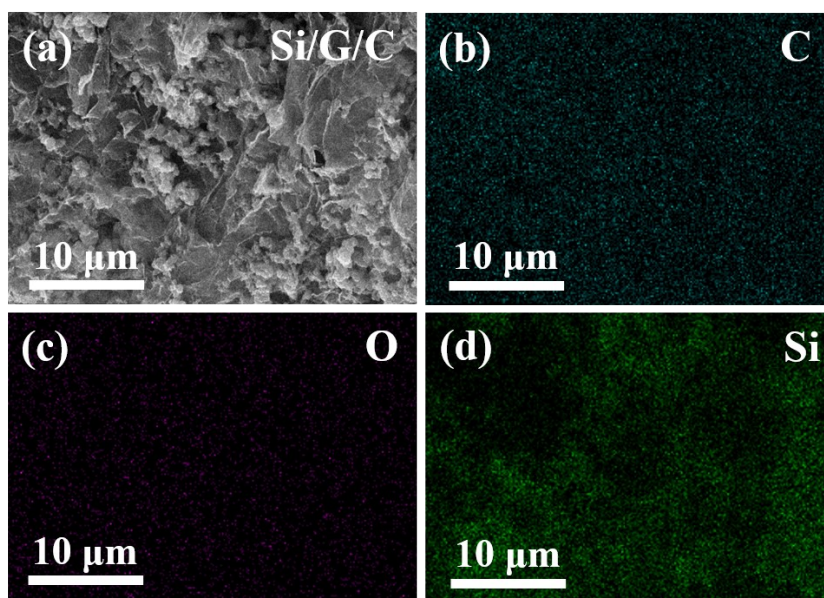

**Fig.S7.** (a) SEM image of Si/G/C. (b-c) the corresponding EDS elemental mappings of C, O, Si in Si/G/C according to Fig. S7(a).
